1 **Main manuscript**

2

3 **Title**

4 Evolution of the potassium channel gene *Kcnj13* underlies colour pattern  
5 diversification in *Danio* fish

6

7 **Authors**

8 Marco Podobnik

9 marco.podobnik@tuebingen.mpg.de

10 <https://orcid.org/0000-0001-5480-7086>

11

12 Hans Georg Frohnhöfer

13 hans-georg.frohnhofer@tuebingen.mpg.de

14 <https://orcid.org/0000-0003-4038-7089>

15

16 Christopher M. Dooley

17 christopher.dooley@tuebingen.mpg.de

18 <https://orcid.org/0000-0002-4941-9019>

19

20 Anastasia Eskova

21 anastasia.eskova@ibm.com

22 <https://orcid.org/0000-0002-4599-2109>

23

24 Christiane Nüsslein-Volhard

25 christiane.nuesslein-volhard@tuebingen.mpg.de

26 <https://orcid.org/0000-0002-7688-1401>

27

28 Uwe Irion

29 uwe.irion@tuebingen.mpg.de

30 <https://orcid.org/0000-0003-2823-5840>

31

## 32 **Abstract**

33 The genetic basis of morphological variation provides a major topic in evolutionary  
34 biology<sup>1-6</sup>. Colour patterns in fish are among the most diverse of all vertebrates.  
35 Species of the genus *Danio* display strikingly different colour patterns ranging from  
36 horizontal stripes, to vertical bars or spots<sup>7-10</sup>. Stripe formation in zebrafish, *Danio*  
37 *rerio*, oriented by the horizontal myoseptum, is a self-organizing process based on  
38 cell-contact-mediated interactions between three types of chromatophores with a  
39 leading role of iridophores<sup>11-14</sup>. We investigated genes known to regulate  
40 chromatophore interactions in zebrafish as candidates that might have evolved to  
41 produce a pattern of vertical bars in its sibling species, *Danio aesculapii*<sup>8,10</sup>. Using  
42 gene editing<sup>15-17</sup> we generated several mutants in *D. aesculapii* that demonstrate a  
43 lower complexity in the interactions between chromatophores in this species, as well  
44 as a minor role of iridophores in patterning. Complementation tests in interspecific  
45 hybrids<sup>18,19</sup> identified *obelix/Kcnj13*, which encodes an inwardly rectifying potassium  
46 channel (Kir7.1)<sup>20</sup>, as a gene evolved between *D. rerio* and *D. aesculapii* as well as  
47 in two of seven more *Danio* species tested. Our results demonstrate that the  
48 CRISPR/Cas9-system allows straightforward genetic tests also in non-model  
49 vertebrates to identify genes that underlie morphological evolution.

50

## 51 **Main**

52 Colour patterns are common features of animals and have important functions in  
53 camouflage, as signals for kin recognition, or mate choice. As targets for natural and  
54 sexual selection, they are of high evolutionary significance<sup>21-24</sup>. The zebrafish, *Danio*  
55 *rerio*, has emerged as a model system to study colour pattern development in a  
56 vertebrate<sup>14,25-29</sup>. A fair number of genes have been identified that are required for  
57 the formation of the pattern<sup>28,29</sup>, which is composed of a series of horizontal light and  
58 dark stripes on the flank of the fish as well as in the anal and tail fins (Fig. 1a). The  
59 adult pattern is created by three different types of pigment cells (chromatophores) in  
60 the skin, black melanophores, blue or silvery iridophores and yellow  
61 xanthophores<sup>13,30-32</sup>. The chromatophores producing this pattern mainly originate

62 from multipotent neural crest–derived stem cells located at the dorsal root ganglia of  
63 the peripheral nervous system<sup>33-37</sup>. Signalling pathways, e.g. Csf1 or Edn3, control  
64 proliferation and spreading of chromatophores<sup>38-40</sup>. During metamorphosis, the  
65 period when adult form and colour pattern are established, assembly into the striped  
66 pattern is controlled by interactions between the three cell types. Several genes are  
67 autonomously required in the chromatophores for these heterotypic  
68 interactions<sup>11,12,20,41-43</sup>. These genes typically encode integral membrane proteins  
69 such as adhesion molecules<sup>42</sup>, channels<sup>20</sup>, or components of cellular junctions, some  
70 of which mediate direct cell contacts<sup>43,44</sup>. In *Meox1* (*choker*) mutants, lacking the  
71 horizontal myoseptum as anatomical landmark, the horizontal orientation is lost, but  
72 stripes form of normal width and composition (Fig. 1b), indicating that stripe  
73 formation is a process of self-organization of the pigment cells<sup>11</sup>.

74

75 *Danio* species show an amazing variety of colour patterns, which range from  
76 horizontal stripes in *D. rerio* (Fig. 1a), over vertical bars in *D. aesculapii*, *D. choprae*  
77 or *D. erythromicron* (Fig. 1c, g, m) to spotted patterns in *D. tinwini* or *D. margaritatus*  
78 (Fig. 1d, h). The *Danio* species diversified for at least 13 million years in Southeast  
79 Asia and their spatial distributions only partially overlap today<sup>10,45</sup>. Hybrids between  
80 *D. rerio* and other *Danio* species can be produced in the laboratory by natural  
81 matings or by *in vitro* fertilization<sup>19</sup>. They invariably display colour patterns similar to  
82 the stripes in *D. rerio*, thus, horizontal stripes appear to be dominant over divergent  
83 patterns (Fig. 1e, f, i, j)<sup>19</sup>; whether this is due to a gain-of-function in striped species  
84 or losses in the other species is an open question<sup>25,28,29</sup>. The hybrids are virtually  
85 sterile impeding further genetic experiments, like QTL mapping, but they allow  
86 interspecific complementation tests<sup>19</sup>. Using this approach, we identified the  
87 potassium channel gene *Kcnj13* as repeatedly evolved in the *Danio* genus.

88

### 89 **Prevalent pattern orientation by the horizontal myoseptum**

90 To reconstruct the history of colour pattern evolution we first investigated how  
91 pattern orientation is inherited in hybrids (see phylogenetic relationships depicted on  
92 the left of Fig. 4). The horizontal orientation of the stripes in *D. rerio* depends on the  
93 horizontal myoseptum (Fig. 1a, b)<sup>11,13</sup>. The closest sibling species to *D. rerio*,

94 *D. aesculapii*, shows a very different pattern of vertically oriented dark bars (Fig.  
95 1c)<sup>8</sup>. Similar barred patterns are exhibited by the more distantly related *D. choprae*  
96 and *D. erythromicron* (Fig. 1g, m). These patterns clearly do not use the horizontal  
97 myoseptum for orientation. In all three cases, hybrids with *D. rerio* show a pattern  
98 that resembles the horizontal *D. rerio* stripes (Fig. 1e, i, n)<sup>29</sup>. Strikingly, hybrids  
99 between *D. aesculapii* and *D. choprae* display a barred pattern (Fig. 1k). This  
100 indicates that the cues for horizontal orientation are lacking and that the pattern  
101 develops in a similar manner in both barred species. In contrast, hybrids between  
102 *D. aesculapii* and *D. erythromicron* develop highly variable patterns without any clear  
103 orientation (Fig. 1o; Extended Data Fig. 1). Therefore, the vertical bars must develop  
104 in a different manner in *D. erythromicron* compared to *D. aesculapii* and *D. choprae*.

105

106 Two *Danio* species display spotted patterns: *D. tinwini* has dark spots on a light  
107 background (Fig. 1d)<sup>9</sup>, whereas *D. margaritatus* shows light spots on a dark  
108 background (Fig. 1h)<sup>7</sup>. In both cases, hybrids with *D. rerio* show a stripe pattern  
109 similar to *D. rerio* (Fig. 1f, j)<sup>29</sup>. Hybrids between the two spotted species also develop  
110 a pattern of horizontal stripes, albeit with some interruptions and irregularities (Fig.  
111 1l). These results indicate that the horizontal myoseptum functions to orient the  
112 pattern in the hybrids between *D. tinwini* and *D. margaritatus*, and therefore in at  
113 least one of the two parental species. It seems likely that this is the case in *D. tinwini*,  
114 as the spots show some horizontal orientation reminiscent of interrupted stripes.  
115 Hybrids between *D. aesculapii* and *D. margaritatus* develop meandering patterns  
116 that do not resemble either of the parental species and lack a clear horizontal or  
117 vertical orientation (Fig. 1p). Based on the most recent phylogeny<sup>10</sup>, we hypothesize  
118 an evolutionary history, in which the horizontal orientation of the pattern in the *D.*  
119 *rerio* group was gained from an ancestral ambiguous pattern and lost again in  
120 *D. aesculapii*. Two other species, *D. erythromicron* and *D. choprae*, independently  
121 might have acquired a vertical orientation from this ancestral pattern. The patterns of  
122 the hybrids between *D. aesculapii* and *D. erythromicron* or *D. margaritatus*, which  
123 are without clear orientation, might resemble such an ancestral pattern. These  
124 patterns are much more variable than the species patterns (Extended Data Fig. 1)  
125 suggesting that the ancestral patterns did not function as recognition signals but  
126 rather provided camouflage.

127

## 128 **Chromatophore interactions in stripes and bars**

129 To investigate the developmental and genetic basis for the differences in pattern  
130 formation, we focussed on the sibling species *D. rerio* and *D. aesculapii*, which  
131 display horizontal stripes and vertical bars, respectively (Fig. 1a, c). In *D. rerio*,  
132 during early metamorphosis, iridophores emerge along the horizontal myoseptum to  
133 form the first light stripe (Extended Data Fig. 2a)<sup>11-13</sup>. In contrast, in *D. aesculapii*  
134 iridophores appear more scattered over the flank and only during later stages  
135 (Extended Data Fig. 2b, d). This indicates that it is not the physical presence of the  
136 horizontal myoseptum, which exists in both species, but specific guidance signals  
137 directing the cells into the skin in *D. rerio*, which lack in *D. aesculapii*. Later, when  
138 iridophores, covered by compact xanthophores, have formed the first contiguous  
139 light stripe with adjacent melanophore stripes in *D. rerio* (Extended Data Fig. 2c, e),  
140 in *D. aesculapii* melanophores and xanthophores intermix broadly (Extended Data  
141 Fig. 2f); they sort out loosely into vertical bars of low contrast without coherent  
142 sheets of dense iridophores between the melanophore bars during later stages  
143 (Extended Data Fig. 2h). Our observations suggest that the different patterns in  
144 these sibling species are produced by the presence or absence of guidance signals  
145 for iridophores along the horizontal myoseptum as well as by cellular interactions  
146 that prevent mixing of melanophores and xanthophores in *D. rerio* but not in *D.*  
147 *aesculapii*.

148

149 To address the role of the different cell types, we used the CRISPR/Cas9 system to  
150 generate mutants lacking individual chromatophore types in *D. aesculapii*. Whereas  
151 in *D. rerio* vestiges of the striped pattern form in the absence of one chromatophore  
152 type (Fig. 2a, b, c)<sup>11</sup>, loss of either melanophores (Fig. 2d) or xanthophores (Fig. 2e)  
153 completely abolishes the patterning in *D. aesculapii*. This indicates that the repulsive  
154 interactions between melanophores or xanthophores and iridophores, which account  
155 for the residual patterns in *D. rerio*<sup>11,12</sup>, are absent in *D. aesculapii*. In contrast,  
156 eliminating iridophores in *D. aesculapii* still permits some melanophore bar formation  
157 (Fig. 2f). This indicates that iridophores, which play a dominant role for stripe

158 formation in *D. rerio*, are dispensable for the formation of vertical bars in  
159 *D. aesculapii*.

160

161 Next, we analysed genes with known functions in heterotypic interactions between  
162 chromatophores. In *D. rerio* loss-of-function mutations in the gap junction genes  
163 *Cx39.4 (luchs)*<sup>44,46</sup> and *Cx41.8/Gja5b (leopard)*<sup>41,46,47</sup> as well as mutations in *Igsf11*  
164 (*seurat*)<sup>42</sup>, which codes for a cell adhesion molecule, lead to melanophore spots (Fig.  
165 2j, Extended Data Fig. 3a, c, e), whereas mutations in *Kir7.1/Kcnj13 (obelix/jaguar)*  
166 result in fewer and wider stripes with some mixing of melanophores and  
167 xanthophores (Fig. 2g)<sup>20,48</sup>. So far, only dominant alleles of *Kcnj13* have been  
168 described<sup>41,46,49</sup>. We used the CRISPR/Cas9 system to generate a *Kcnj13* loss-of-  
169 function allele in *D. rerio*, which is recessive (Fig. 2h, Extended Data Fig. 3e, g,  
170 Supplementary Information). To investigate the functions of these four genes in  
171 *D. aesculapii*, we generated mutants in the orthologs. In all of them we find an even  
172 distribution of melanophores (Fig. 2i, Extended Data Fig. 3b, d, f, h) indicating that  
173 the interactions mediated by these genes are essential to generate the melanophore  
174 bars in *D. aesculapii*. The complete loss of a pattern in single mutants in *D.*  
175 *aesculapii* is different from *D. rerio* where this occurs only in double mutants  
176 (Fig. 2k)<sup>46</sup>. In concert with predictions of agent-based models of patterning<sup>50</sup>, this  
177 indicates that the robust formation of horizontal stripes in *D. rerio* is due to a gain in  
178 complexity based on partially redundant chromatophore interactions. These are  
179 dominated by iridophores and oriented by an as yet unidentified signal along the  
180 horizontal myoseptum. *D. aesculapii* might have secondarily lost the dominance of  
181 iridophores leading to a pattern based primarily on interactions between  
182 xanthophores and melanophores and thus of lower complexity.

183

184 The ability to generate loss-of-function mutations in both species allowed us to  
185 generate interspecific hybrids, which carry loss-of-function alleles from both parental  
186 species. These hybrids are very similar to the respective *D. rerio* mutants (Fig. 2l,  
187 Extended Data Fig. 3i, j), indicating that these genes have the same functions during  
188 stripe formation in *D. rerio* and the hybrids.

189

190 ***Kcnj13* evolved repeatedly in the *Danio* genus**

191 Next, we generated reciprocal heterozygotes, i.e. interspecific hybrids carrying a  
192 loss-of-function allele from either one of the parental species in an otherwise  
193 identical genetic background<sup>18</sup>. This powerful genetic test to identify evolved genes  
194 has not been applied in vertebrates, so far. We expect similar patterns in these  
195 hybrids if the gene function can be fully provided by either wild-type allele. A  
196 qualitatively altered hybrid pattern would reveal that one of the wild-type alleles  
197 cannot complement the loss-of-function of the other, therefore indicating functional  
198 changes during evolution. We found that heterozygous hybrids with the loss-of-  
199 function allele of *Kcnj13* from *D. rerio* display a pattern of spots or interrupted stripes  
200 whereas a striped pattern forms with the mutant allele from *D. aesculapii* (Fig. 3a, b,  
201 Extended Data Fig. 4g, h). This indicates that the wild-type allele from *D. aesculapii*  
202 cannot compensate for the loss of the *D. rerio* allele. In contrast, in the case of  
203 heterozygous hybrids with *Cx39.4*, *Cx41.8* and *Igsf11* striped patterns  
204 indistinguishable from wild-type hybrids are formed regardless whether the wild-type  
205 allele stems from *D. rerio* (Extended Data Fig. 4b, d, f) or the other species  
206 (Extended Data Fig. 4a, c, e). These reciprocal heterozygosity tests indicate that  
207 *Cx39.4*, *Cx41.8* and *Igsf11* provide similar functions in both species, whereas the  
208 function of *Kcnj13* has evolved between the two species.

209

210 To investigate if *Kcnj13* underlies the pattern variation more broadly across the  
211 *Danio* genus, we tested seven additional species (Fig. 4a, top to bottom). As  
212 mentioned above, wild-type hybrids between *D. rerio* and all other *Danio* species  
213 display horizontal stripes, resembling the *D. rerio* pattern, with slight defects in  
214 *D. albolineatus* (Fig. 4b). Strikingly, not only *D. rerio Kcnj13* k.o. / *D. aesculapii*  
215 hybrids (Fig. 4c, highlighted in magenta) but also *D. rerio Kcnj13* k.o. / *D. tinwini*  
216 hybrids developed patterns of spots or interrupted stripes indicating that the *Kcnj13*  
217 function must have evolved compared to *D. rerio* (Fig. 4c, highlighted in yellow). This  
218 pattern, which is qualitatively different from all wild-type hybrids and also from the *D.*  
219 *rerio Kcnj13* mutant pattern, is similar to the parental pattern of *D. tinwini*, where  
220 dense iridophores interrupt the dark melanophore stripes (Fig. 1d, Fig. 4c). *D. rerio*  
221 *Kcnj13* k.o. / *D. choprae* hybrids also developed patterns that resemble interrupted



222 stripes (Fig. 4c, highlighted in cyan), similar to the *D. rerio Kcnj13* k.o. / *D. aesculapii*  
223 hybrid pattern (Fig. 4c). No qualitative differences were detected between wild-type  
224 hybrids (Fig. 4b) and hybrids heterozygous for *D. rerio Kcnj13* in the case of *D.*  
225 *kyathit*, *D. nigrofasciatus*, *D. albolineatus*, *D. erythromicron* and *D. margaritatus* (Fig.  
226 4c). This indicates that the alleles from these species complement the loss of the *D.*  
227 *rerio Kcnj13* allele. Functional changes of *Kcnj13* occurred in *D. aesculapii*, *D. tinwini*  
228 and *D. choprae* compared to *D. rerio*, however, heterozygous hybrids did not  
229 develop pure *D. rerio Kcnj13* mutant patterns indicating that the orthologs still  
230 provide some function for patterning across all species tested. The separated  
231 positions of the three species with the different functions of *Kcnj13* in the  
232 phylogenetic tree (graph on the left of Fig. 4)<sup>10</sup> indicate a repeated and independent  
233 evolution of the same gene.

234

### 235 ***Kcnj13***

236 Potassium channels have important roles in tissue patterning<sup>51</sup>, notably in the  
237 regulation of allometric growth of fins in *D. rerio*<sup>52,53</sup>. *Kcnj13* encodes an inwardly  
238 rectifying potassium channel (Kir7.1) conserved in vertebrates (Extended Data Fig.  
239 5). Mutations are known to cause defects in tracheal development in mice<sup>54</sup> and two  
240 rare diseases in humans leading to visual impairment<sup>54-60</sup>. During colour pattern  
241 formation in *D. rerio* its function is autonomously required in melanophores<sup>48</sup>, and in  
242 *ex vivo* studies it was shown that the channel is involved in the contact-dependent  
243 depolarisation of melanophores upon interaction with xanthophores leading to a  
244 repulsion between these cells<sup>43</sup>. Evolution in *Kcnj13* in *D. aesculapii*, *D. tinwini* and  
245 *D. choprae* might therefore cause differences in heterotypic chromatophore  
246 interactions between species. The protein coding sequences of *Kcnj13* orthologs are  
247 highly conserved in all *Danio* species with only very few diverged sites in the  
248 cytoplasmic N- and C-terminal parts of the protein (Extended Data Fig. 6). Whether  
249 any of these amino acid changes might affect the function of the channel and/or if  
250 changes in gene expression are the basis for the repeated evolution of *Kcnj13* will  
251 require further experiments.

252



253 In contrast to mammals and birds, basal vertebrates retained several chromatophore  
254 types providing a substrate for the development of elaborate colour patterns. Their  
255 rapid and extensive evolutionary diversification is most likely if the number of  
256 underlying genes is small<sup>61</sup>. Several patterning genes have been repeatedly  
257 identified in genetic screens in *D. rerio*<sup>41,46,49</sup>. These genes provide candidates that  
258 might have evolved to contribute to patterning differences between *Danio* species.  
259 Evolved genes have been identified in *D. albolineatus* and *D. nigrofasciatus*, where  
260 changes in two signalling pathways, Csf1 or Edn3, likely underlie patterning  
261 variations by differentially promoting xanthophore or iridophore development,  
262 respectively<sup>19,36,62</sup>. We focused on genes regulating heterotypic interactions between  
263 chromatophores as a potential genetic basis for colour pattern evolution. Using  
264 interspecific mutant complementation tests we identified the potassium channel gene  
265 *Kcnj13* as contributing to patterning divergence in multiple *Danio* species. We have  
266 shown that this genus offers the opportunity to identify evolved genes and to  
267 reconstruct the evolution of biodiversity.

268

## 269 Main Text References

- 270 1 Sucena, E. & Stern, D. L. Divergence of larval morphology between  
271 *Drosophila sechellia* and its sibling species caused by cis-regulatory evolution  
272 of *ovo/shaven-baby*. *Proceedings of the National Academy of Sciences of the*  
273 *United States of America* **97**, 4530-4534, doi:10.1073/pnas.97.9.4530 (2000).
- 274 2 Colosimo, P. F. *et al.* Widespread parallel evolution in sticklebacks by  
275 repeated fixation of Ectodysplasin alleles. *Science* **307**, 1928-1933,  
276 doi:10.1126/science.1107239 (2005).
- 277 3 Westerman, E. L. *et al.* Aristaless Controls Butterfly Wing Color Variation  
278 Used in Mimicry and Mate Choice. *Curr Biol* **28**, 3469-3474 e3464,  
279 doi:10.1016/j.cub.2018.08.051 (2018).
- 280 4 Barrett, R. D. H. *et al.* Linking a mutation to survival in wild mice. *Science* **363**,  
281 499-504, doi:10.1126/science.aav3824 (2019).
- 282 5 Hu, Y., Linz, D. M. & Moczek, A. P. Beetle horns evolved from wing serial  
283 homologs. *Science* **366**, 1004-1007, doi:10.1126/science.aaw2980 (2019).

- 284 6 Orteu, A. & Jiggins, C. D. The genomics of coloration provides insights into  
285 adaptive evolution. *Nat Rev Genet*, doi:10.1038/s41576-020-0234-z (2020).
- 286 7 Roberts, T. R. The 'celestial pearl danio', a new genus and species of  
287 colourful minute cyprinid fish from Myanmar (Pisces: Cypriniformes). *Raffles*  
288 *Bulletin of Zoology* **55**, 131-140 (2007).
- 289 8 Kullander, S. O. & Fang, F. *Danio aesculapii*, a new species of danio from  
290 south-western Myanmar (Teleostei: Cyprinidae). *Zootaxa* **2164**, 41-48 (2009).
- 291 9 Kullander, S. O. & Fang, F. *Danio tinwini*, a new species of spotted danio from  
292 northern Myanmar (Teleostei: Cyprinidae). *Ichthyological Exploration of*  
293 *Freshwaters* **20**, 223-228 (2009).
- 294 10 McCluskey, B. M. & Postlethwait, J. H. Phylogeny of zebrafish, a "model  
295 species," within *Danio*, a "model genus". *Mol Biol Evol* **32**, 635-652,  
296 doi:10.1093/molbev/msu325 (2015).
- 297 11 Frohnhöfer, H. G., Krauss, J., Maischein, H. M. & Nüsslein-Volhard, C.  
298 Iridophores and their interactions with other chromatophores are required for  
299 stripe formation in zebrafish. *Development* **140**, 2997-3007,  
300 doi:10.1242/dev.096719 (2013).
- 301 12 Patterson, L. B. & Parichy, D. M. Interactions with iridophores and the tissue  
302 environment required for patterning melanophores and xanthophores during  
303 zebrafish adult pigment stripe formation. *PLoS genetics* **9**, e1003561,  
304 doi:10.1371/journal.pgen.1003561 (2013).
- 305 13 Singh, A. P., Schach, U. & Nüsslein-Volhard, C. Proliferation, dispersal and  
306 patterned aggregation of iridophores in the skin prefigure striped colouration  
307 of zebrafish. *Nature cell biology* **16**, 607-614, doi:10.1038/ncb2955 (2014).
- 308 14 Irion, U., Singh, A. P. & Nüsslein-Volhard, C. in *Current Topics in*  
309 *Developmental Biology* Ch. 8, (Elsevier Inc., 2016).
- 310 15 Jinek, M. *et al.* A programmable dual-RNA-guided DNA endonuclease in  
311 adaptive bacterial immunity. *Science* **337**, 816-821,  
312 doi:10.1126/science.1225829 (2012).
- 313 16 Hwang, W. Y. *et al.* Heritable and precise zebrafish genome editing using a  
314 CRISPR-Cas system. *PLoS one* **8**, e68708, doi:10.1371/journal.pone.0068708  
315 (2013).

- 316 17 Irion, U., Krauss, J. & Nüsslein-Volhard, C. Precise and efficient genome  
317 editing in zebrafish using the CRISPR/Cas9 system. *Development* **141**, 4827-  
318 4830, doi:10.1242/dev.115584 (2014).
- 319 18 Stern, D. L. Identification of loci that cause phenotypic variation in diverse  
320 species with the reciprocal hemizyosity test. *Trends Genet* **30**, 547-554,  
321 doi:10.1016/j.tig.2014.09.006 (2014).
- 322 19 Parichy, D. M. & Johnson, S. L. Zebrafish hybrids suggest genetic  
323 mechanisms for pigment pattern diversification in Danio. *Development genes*  
324 *and evolution* **211**, 319-328 (2001).
- 325 20 Iwashita, M. *et al.* Pigment pattern in jaguar/obelix zebrafish is caused by a  
326 Kir7.1 mutation: implications for the regulation of melanosome movement.  
327 *PLoS genetics* **2**, e197, doi:10.1371/journal.pgen.0020197 (2006).
- 328 21 Darwin, C. The Descent of Man, and Selection in Relation to Sex. *John*  
329 *Murray, London.* (1871).
- 330 22 Protas, M. E. & Patel, N. H. Evolution of coloration patterns. *Annu Rev Cell*  
331 *Dev Biol* **24**, 425-446, doi:10.1146/annurev.cellbio.24.110707.175302 (2008).
- 332 23 Cuthill, I. C. *et al.* The biology of color. *Science* **357**,  
333 doi:10.1126/science.aan0221 (2017).
- 334 24 Nüsslein-Volhard, C., Grutzmacher, S. & Howard, J. *Animal beauty : on the*  
335 *evolution of biological aesthetics.* (The MIT Press, 2019).
- 336 25 Parichy, D. M. Evolution of danio pigment pattern development. *Heredity* **97**,  
337 200-210, doi:10.1038/sj.hdy.6800867 (2006).
- 338 26 Kondo, S., Iwashita, M. & Yamaguchi, M. How animals get their skin patterns:  
339 fish pigment pattern as a live Turing wave. *Int J Dev Biol* **53**, 851-856,  
340 doi:10.1387/ijdb.072502sk (2009).
- 341 27 Singh, A. P. & Nüsslein-Volhard, C. Zebrafish stripes as a model for  
342 vertebrate colour pattern formation. *Curr Biol* **25**, R81-92,  
343 doi:10.1016/j.cub.2014.11.013 (2015).
- 344 28 Irion, U. & Nüsslein-Volhard, C. The identification of genes involved in the  
345 evolution of color patterns in fish. *Curr Opin Genet Dev* **57**, 31-38,  
346 doi:10.1016/j.gde.2019.07.002 (2019).
- 347 29 Patterson, L. B. & Parichy, D. M. Zebrafish Pigment Pattern Formation:  
348 Insights into the Development and Evolution of Adult Form. *Annu Rev Genet*  
349 **53**, 505-530, doi:10.1146/annurev-genet-112618-043741 (2019).

- 350 30 Hirata, M., Nakamura, K., Kanemaru, T., Shibata, Y. & Kondo, S. Pigment cell  
351 organization in the hypodermis of zebrafish. *Developmental dynamics : an*  
352 *official publication of the American Association of Anatomists* **227**, 497-503,  
353 doi:10.1002/dvdy.10334 (2003).
- 354 31 Hirata, M., Nakamura, K. & Kondo, S. Pigment cell distributions in different  
355 tissues of the zebrafish, with special reference to the striped pigment pattern.  
356 *Developmental dynamics : an official publication of the American Association*  
357 *of Anatomists* **234**, 293-300, doi:10.1002/dvdy.20513 (2005).
- 358 32 Mahalwar, P., Walderich, B., Singh, A. P. & Nüsslein-Volhard, C. Local  
359 reorganization of xanthophores fine-tunes and colors the striped pattern of  
360 zebrafish. *Science* **345**, 1362-1364, doi:10.1126/science.1254837 (2014).
- 361 33 Budi, E. H., Patterson, L. B. & Parichy, D. M. Post-embryonic nerve-  
362 associated precursors to adult pigment cells: genetic requirements and  
363 dynamics of morphogenesis and differentiation. *PLoS genetics* **7**, e1002044,  
364 doi:10.1371/journal.pgen.1002044 (2011).
- 365 34 Mongera, A. *et al.* Genetic lineage labeling in zebrafish uncovers novel neural  
366 crest contributions to the head, including gill pillar cells. *Development* **140**,  
367 916-925, doi:10.1242/dev.091066 (2013).
- 368 35 Dooley, C. M., Mongera, A., Walderich, B. & Nusslein-Volhard, C. On the  
369 embryonic origin of adult melanophores: the role of ErbB and Kit signalling in  
370 establishing melanophore stem cells in zebrafish. *Development* **140**, 1003-  
371 1013, doi:10.1242/dev.087007 (2013).
- 372 36 Patterson, L. B., Bain, E. J. & Parichy, D. M. Pigment cell interactions and  
373 differential xanthophore recruitment underlying zebrafish stripe reiteration and  
374 Danio pattern evolution. *Nature communications* **5**, 5299,  
375 doi:10.1038/ncomms6299 (2014).
- 376 37 Singh, A. P. *et al.* Pigment Cell Progenitors in Zebrafish Remain Multipotent  
377 through Metamorphosis. *Dev Cell* **38**, 316-330,  
378 doi:10.1016/j.devcel.2016.06.020 (2016).
- 379 38 Parichy, D. M. *et al.* Mutational analysis of endothelin receptor b1 (rose)  
380 during neural crest and pigment pattern development in the zebrafish Danio  
381 rerio. *Developmental biology* **227**, 294-306, doi:10.1006/dbio.2000.9899  
382 (2000).

- 383 39 Parichy, D. M. & Turner, J. M. Temporal and cellular requirements for Fms  
384 signaling during zebrafish adult pigment pattern development. *Development*  
385 **130**, 817-833 (2003).
- 386 40 Walderich, B., Singh, A. P., Mahalwar, P. & Nusslein-Volhard, C. Homotypic  
387 cell competition regulates proliferation and tiling of zebrafish pigment cells  
388 during colour pattern formation. *Nat Commun* **7**, 11462,  
389 doi:10.1038/ncomms11462 (2016).
- 390 41 Haffter, P. *et al.* Mutations affecting pigmentation and shape of the adult  
391 zebrafish. *Development genes and evolution* **206**, 260-276, doi:DOI  
392 10.1007/s004270050051 (1996).
- 393 42 Eom, D. S. *et al.* Melanophore migration and survival during zebrafish adult  
394 pigment stripe development require the immunoglobulin superfamily adhesion  
395 molecule Igsf11. *PLoS genetics* **8**, e1002899,  
396 doi:10.1371/journal.pgen.1002899 (2012).
- 397 43 Inaba, M., Yamanaka, H. & Kondo, S. Pigment pattern formation by contact-  
398 dependent depolarization. *Science* **335**, 677, doi:10.1126/science.1212821  
399 (2012).
- 400 44 Watanabe, M., Sawada, R., Aramaki, T., Skerrett, I. M. & Kondo, S. The  
401 Physiological Characterization of Connexin41.8 and Connexin39.4, Which Are  
402 Involved in the Striped Pattern Formation of Zebrafish. *J Biol Chem* **291**,  
403 1053-1063, doi:10.1074/jbc.M115.673129 (2016).
- 404 45 Parichy, D. M. Advancing biology through a deeper understanding of  
405 zebrafish ecology and evolution. *Elife* **4**, doi:10.7554/eLife.05635 (2015).
- 406 46 Irion, U. *et al.* Gap junctions composed of connexins 41.8 and 39.4 are  
407 essential for colour pattern formation in zebrafish. *Elife* **3**, e05125,  
408 doi:10.7554/eLife.05125 (2014).
- 409 47 Watanabe, M. *et al.* Spot pattern of leopard Danio is caused by mutation in  
410 the zebrafish connexin41.8 gene. *EMBO reports* **7**, 893-897,  
411 doi:10.1038/sj.embor.7400757 (2006).
- 412 48 Maderspacher, F. & Nüsslein-Volhard, C. Formation of the adult pigment  
413 pattern in zebrafish requires leopard and obelix dependent cell interactions.  
414 *Development* **130**, 3447-3457 (2003).

- 415 49 Henke, K. *et al.* Genetic Screen for Postembryonic Development in the  
416 Zebrafish (*Danio rerio*): Dominant Mutations Affecting Adult Form. *Genetics*  
417 **207**, 609-623, doi:10.1534/genetics.117.300187 (2017).
- 418 50 Volkening, A. & Sandstede, B. Iridophores as a source of robustness in  
419 zebrafish stripes and variability in *Danio* patterns. *Nat Commun* **9**, 3231,  
420 doi:10.1038/s41467-018-05629-z (2018).
- 421 51 Dahal, G. R. *et al.* An inwardly rectifying K<sup>+</sup> channel is required for patterning.  
422 *Development* **139**, 3653-3664, doi:10.1242/dev.078592 (2012).
- 423 52 Perathoner, S. *et al.* Bioelectric signaling regulates size in zebrafish fins.  
424 *PLoS genetics* **10**, e1004080, doi:10.1371/journal.pgen.1004080 (2014).
- 425 53 Stewart, S. *et al.* *longfin* causes *cis*-ectopic  
426 expression of the *kcnh2a ether-a-go-go* K<sup>+</sup> channel to  
427 autonomously prolong fin outgrowth. *bioRxiv*, 790329, doi:10.1101/790329  
428 (2019).
- 429 54 Lee, M. M., Ritter, R., 3rd, Hirose, T., Vu, C. D. & Edwards, A. O. Snowflake  
430 vitreoretinal degeneration: follow-up of the original family. *Ophthalmology* **110**,  
431 2418-2426, doi:10.1016/S0161-6420(03)00828-5 (2003).
- 432 55 Hejtmancik, J. F. *et al.* Mutations in KCNJ13 cause autosomal-dominant  
433 snowflake vitreoretinal degeneration. *Am J Hum Genet* **82**, 174-180,  
434 doi:10.1016/j.ajhg.2007.08.002 (2008).
- 435 56 Sergouniotis, P. I. *et al.* Recessive mutations in KCNJ13, encoding an  
436 inwardly rectifying potassium channel subunit, cause leber congenital  
437 amaurosis. *Am J Hum Genet* **89**, 183-190, doi:10.1016/j.ajhg.2011.06.002  
438 (2011).
- 439 57 Khan, A. O., Bergmann, C., Neuhaus, C. & Bolz, H. J. A distinct vitreo-retinal  
440 dystrophy with early-onset cataract from recessive KCNJ13 mutations.  
441 *Ophthalmic Genet* **36**, 79-84, doi:10.3109/13816810.2014.985846 (2015).
- 442 58 Pattnaik, B. R. *et al.* A Novel KCNJ13 Nonsense Mutation and Loss of Kir7.1  
443 Channel Function Causes Leber Congenital Amaurosis (LCA16). *Hum Mutat*  
444 **36**, 720-727, doi:10.1002/humu.22807 (2015).
- 445 59 Perez-Roustit, S. *et al.* Leber Congenital Amaurosis with Large Retinal  
446 Pigment Clumps Caused by Compound Heterozygous Mutations in *Kcnj13*.  
447 *Retin Cases Brief Rep* **11**, 221-226, doi:10.1097/ICB.0000000000000326  
448 (2017).

- 449 60 Toms, M. *et al.* Missense variants in the conserved transmembrane M2  
450 protein domain of KCNJ13 associated with retinovascular changes in humans  
451 and zebrafish. *Exp Eye Res* **189**, 107852, doi:10.1016/j.exer.2019.107852  
452 (2019).
- 453 61 Gavrillets, S. & Losos, J. B. Adaptive radiation: contrasting theory with data.  
454 *Science* **323**, 732-737, doi:10.1126/science.1157966 (2009).
- 455 62 Spiewak, J. E. *et al.* Evolution of Endothelin signaling and diversification of  
456 adult pigment pattern in Danio fishes. *PLoS genetics* **14**, e1007538,  
457 doi:10.1371/journal.pgen.1007538 (2018).  
458



## 459 **Methods**

460 No statistical methods were used to predetermine sample size. The experiments  
461 were not randomized. The investigators were not blinded to allocation during  
462 experiments and outcome assessment.

463

### 464 Fish husbandry

465 Zebrafish, *D. rerio*, were maintained as described earlier<sup>1</sup>. If not newly generated  
466 (Table 4, Supplementary Information), the following genotypes were used: wild-type  
467 Tuebingen/TU, *nacre*<sup>w2</sup>/*nac*/*Mitfa*<sup>2</sup>, *pfeffer*<sup>tm236</sup>/*pfe*/*Csf1ra*<sup>3</sup>, *transparent*<sup>b6</sup>/*tra*/*Mpv17*<sup>A</sup>,  
468 *leopard*<sup>t1</sup>/*leo*/*Cx41.8*<sup>5,6</sup>, *luchs*<sup>t37ui</sup>/*luc*/*Cx39.4*<sup>7</sup>, *obelix*<sup>tXG6</sup>/*obe*/*Kcnj13*<sup>7</sup>.

469 *D. aesculapii* and *D. albolineatus* were treated identical to *D. rerio*. For the other  
470 *Danio* species, *D. kyathit*, *D. tinwini*, *D. nigrofasciatus*, *D. choprae*, *D. margaritatus*  
471 and *D. erythromicron* individual pair matings were not successful. Therefore, the fish  
472 were kept in groups in tanks containing boxes lightly covered with Java moss  
473 (*Taxiphyllum barbieri*), which resulted in sporadic matings and allowed us to collect  
474 fertilized eggs.

475 Interspecific hybrids were either obtained by natural matings or by in vitro  
476 fertilizations<sup>8</sup>. Heterozygous or trans-heterozygous mutant hybrids were identified by  
477 PCR and sequence analysis using specific primer pairs (Table 1 and 3,  
478 Supplementary Information).

479 All species were staged according to the normal table of *D. rerio* development<sup>9</sup>. All  
480 animal experiments were performed in accordance with the rules of the State of  
481 Baden-Württemberg, Germany, and approved by the Regierungspräsidium  
482 Tübingen.

483

### 484 CRISPR/Cas9 gene editing

485 The CRISPR/Cas9 system was applied either as described in<sup>10</sup> or according to the  
486 guidelines for embryo microinjection of IDT. Briefly, oligonucleotides were cloned into  
487 pDR274 to generate the sgRNA vector (Table 2, Supplementary Information).  
488 sgRNAs were transcribed from the linearized vector using the MEGAscript T7

489 Transcription Kit (Invitrogen). Alternatively, target-specific crRNAs and universal  
490 tracrRNAs were purchased from IDT. sgRNAs or crRNA:tracrRNA duplexes were  
491 injected as ribonucleoprotein complexes with Cas9 proteins into one-cell stage  
492 embryos. The efficiency of indel generation was tested on eight larvae at 1 dpf by  
493 PCR using specific primer pairs and by sequence analysis as described previously  
494 (Table 1 and 3, Supplementary Information)<sup>11</sup>. The remaining larvae were raised to  
495 adulthood. Mature F0 fish carrying indels were outcrossed. Loss-of-function alleles in  
496 heterozygous F1 fish were selected to establish homozygous or trans-heterozygous  
497 mutant lines (Table 4, Supplementary Information).

498

499 Image acquisition

500 Anesthesia of adult fish was performed as described previously<sup>11</sup>. A Canon 5D Mk II  
501 camera was used to obtain images. Juvenile fish were either embedded in low  
502 melting point agarose or fixed in 4% formaldehyde/0.08% glutaraldehyde and then  
503 photographed under a Leica MZ1 stereomicroscope (Extended Data Fig. 2). Images  
504 were processed using Fiji<sup>12</sup>, Adobe Photoshop and Adobe Illustrator CS6.

505

506 RNA-Sequencing and transcriptome analysis

507 Skin of *Danio* species

508 Adult fish (n=5 each for *D. rerio* (TU), *D. aesculapii*, *D. kyathit*, *D. nigrofasciatus*,  
509 *D. tinwini*, *D. albolineatus*, *D. choprae*, *D. erythromicron*, *D. margaritatus*) were  
510 euthanized by exposure to buffered 0.5 g/L MS-222 (Tricaine). Skin tissues were  
511 dissected in ice-cold PBS and collected using TRIzol (Life Technologies). RNA  
512 integrity and quantity were assessed by Agilent 2100 Bioanalyzer. Library  
513 preparation (TruSeq stranded mRNA, Illumina; 200 ng per sample) and sequencing  
514 (NovaSeq 6000, 2 x 100 bp) were performed by CeGaT GmbH (Tübingen,  
515 Germany). RNA-Seq analysis was carried out using the *Danio rerio* GRCz11  
516 genome build for all *Danio* species and STAR aligner with default settings<sup>13</sup>.  
517 Differential expression analysis was then carried out using DESeq2<sup>14</sup>. The actual  
518 commands used can be found here: <https://github.com/najasplus/STAR-deseq2>.

519

520 Sequence analysis

521 We found SNPs in the coding region of *Kcnj13* and considered other resources<sup>15</sup>,  
522 including the latest zebrafish reference genome assembly (GRCz11) and the ENA  
523 deposition Zebrafish Genome Diversity (PRJEB20043, Wellcome Trust Sanger).  
524 Also, all identified SNPs in the *kcnj13* coding sequence from the Zebrafish Mutation  
525 Project were incorporated<sup>16</sup>. The variant calling pipeline for all *Danio* species  
526 consisted of GATK 3.8 and 4 and picard<sup>17</sup> from STAR-aligned bam files based on  
527 GATK Best-Practices pipeline. The full commands used can be found here:  
528 [https://github.com/najasplus/rnaseq\\_variant\\_calling](https://github.com/najasplus/rnaseq_variant_calling). Furthermore, variants were also  
529 called and checked using SAMtools, mpileup and bcftools<sup>18</sup>. The protein sequence  
530 alignment was produced using T-coffee<sup>19</sup> and refined using BOXSHADE (developed  
531 by Kay Hofmann and Michael D. Baron, unpublished) and Microsoft Word.

532

### 533 **Methods References**

- 534 1 Brand, M., Granato, M. & Nüsslein-Volhard, C. in *Zebrafish: A Practical*  
535 *Approach* (eds C. Nüsslein-Volhard & R. Dahm) (Oxford University Press,  
536 2002).
- 537 2 Lister, J. A., Robertson, C. P., Lepage, T., Johnson, S. L. & Raible, D. W.  
538 nacre encodes a zebrafish microphthalmia-related protein that regulates  
539 neural-crest-derived pigment cell fate. *Development* **126**, 3757-3767 (1999).
- 540 3 Odenthal, J. *et al.* Mutations affecting xanthophore pigmentation in the  
541 zebrafish, *Danio rerio*. *Development* **123**, 391-398 (1996).
- 542 4 Krauss, J., Astrinidis, P., Fröhnhofer, H. G., Walderich, B. & Nüsslein-Volhard,  
543 C. transparent, a gene affecting stripe formation in Zebrafish, encodes the  
544 mitochondrial protein Mpv17 that is required for iridophore survival. *Biol Open*  
545 **2**, 703-710, doi:10.1242/bio.20135132 (2013).
- 546 5 Haffter, P. *et al.* Mutations affecting pigmentation and shape of the adult  
547 zebrafish. *Development genes and evolution* **206**, 260-276, doi:DOI  
548 10.1007/s004270050051 (1996).

- 549 6 Watanabe, M. *et al.* Spot pattern of leopard Danio is caused by mutation in  
550 the zebrafish connexin41.8 gene. *EMBO reports* **7**, 893-897,  
551 doi:10.1038/sj.embor.7400757 (2006).
- 552 7 Irion, U. *et al.* Gap junctions composed of connexins 41.8 and 39.4 are  
553 essential for colour pattern formation in zebrafish. *Elife* **3**, e05125,  
554 doi:10.7554/eLife.05125 (2014).
- 555 8 Parichy, D. M. & Johnson, S. L. Zebrafish hybrids suggest genetic  
556 mechanisms for pigment pattern diversification in Danio. *Development genes*  
557 *and evolution* **211**, 319-328 (2001).
- 558 9 Parichy, D. M., Elizondo, M. R., Mills, M. G., Gordon, T. N. & Engeszer, R. E.  
559 Normal table of postembryonic zebrafish development: staging by externally  
560 visible anatomy of the living fish. *Developmental dynamics : an official*  
561 *publication of the American Association of Anatomists* **238**, 2975-3015,  
562 doi:10.1002/dvdy.22113 (2009).
- 563 10 Irion, U., Krauss, J. & Nüsslein-Volhard, C. Precise and efficient genome  
564 editing in zebrafish using the CRISPR/Cas9 system. *Development* **141**, 4827-  
565 4830, doi:10.1242/dev.115584 (2014).
- 566 11 Meeker, N. D., Hutchinson, S. A., Ho, L. & Trede, N. S. Method for isolation of  
567 PCR-ready genomic DNA from zebrafish tissues. *Biotechniques* **43**, 610, 612,  
568 614, doi:10.2144/000112619 (2007).
- 569 12 Schindelin, J. *et al.* Fiji: an open-source platform for biological-image analysis.  
570 *Nat Methods* **9**, 676-682, doi:10.1038/nmeth.2019 (2012).
- 571 13 Dobin, A. & Gingeras, T. R. Mapping RNA-seq Reads with STAR. *Curr Protoc*  
572 *Bioinformatics* **51**, 11 14 11-11 14 19, doi:10.1002/0471250953.bi1114s1  
573 (2015).
- 574 14 Love, M. I., Huber, W. & Anders, S. Moderated estimation of fold change and  
575 dispersion for RNA-seq data with DESeq2. *Genome Biol* **15**, 550,  
576 doi:10.1186/s13059-014-0550-8 (2014).
- 577 15 Bowen, M. E., Henke, K., Siegfried, K. R., Warman, M. L. & Harris, M. P.  
578 Efficient mapping and cloning of mutations in zebrafish by low-coverage  
579 whole-genome sequencing. *Genetics* **190**, 1017-1024,  
580 doi:10.1534/genetics.111.136069 (2012).

- 581 16 Dooley, C. M. *et al.* Multi-allelic phenotyping--a systematic approach for the  
582 simultaneous analysis of multiple induced mutations. *Methods* **62**, 197-206,  
583 doi:10.1016/j.ymeth.2013.04.013 (2013).
- 584 17 Poplin, R. *et al.* Scaling accurate genetic variant discovery to tens of  
585 thousands of samples. *bioRxiv*, 201178, doi:10.1101/201178 (2018).
- 586 18 Li, H. *et al.* The Sequence Alignment/Map format and SAMtools.  
587 *Bioinformatics* **25**, 2078-2079, doi:10.1093/bioinformatics/btp352 (2009).
- 588 19 Notredame, C., Higgins, D. G. & Heringa, J. T-Coffee: A novel method for fast  
589 and accurate multiple sequence alignment. *J Mol Biol* **302**, 205-217,  
590 doi:10.1006/jmbi.2000.4042 (2000).

591

## 592 **Data and code availability**

593 The dataset generated during this study is available at The European Nucleotide  
594 Archive (ENA) accession number: pending.

595

## 596 **Acknowledgements**

597 We thank all members of the Nüsslein-Volhard laboratory. This work was supported  
598 by an ERC Advanced Grant “DanioPattern” (694289) and the Max Planck Society,  
599 Germany.

600

## 601 **Author information**

602 Affiliations

603 Department ECVN, Max Planck Institute for Developmental Biology, Tübingen,  
604 Baden-Württemberg, Germany

605 Marco Podobnik, Hans Georg Frohnhofer, Christopher Dooley, Anastasia Eskova,  
606 Christiane Nüsslein-Volhard, Uwe Irion

607 IBM Systems, IBM Research and Development GmbH, Böblingen, Baden-  
608 Württemberg, Germany

609 Anastasia Eskova

610

611 Contributions

612 All authors were involved in the design of the experiments. M.P., U.I. and H.G.F.  
613 performed the experiments. U.I., C.N.V., M.P., H.G.F. and C.D. analysed the data  
614 with support of A.E. M.P. made the figures with contributions from U.I. and C.N.V.  
615 U.I., C.N.V. and M.P. wrote the manuscript. C.N.V. and U.I. acquired funding.

616

617 Corresponding author

618 Correspondence to Uwe Irion.

619

620 **Ethics declaration**

621 Competing interests

622 The authors declare no competing interests.

623

624

625

626

627

628

629

630

631

632

633

634

635

636

637 **Figures and Figure Legends**

638

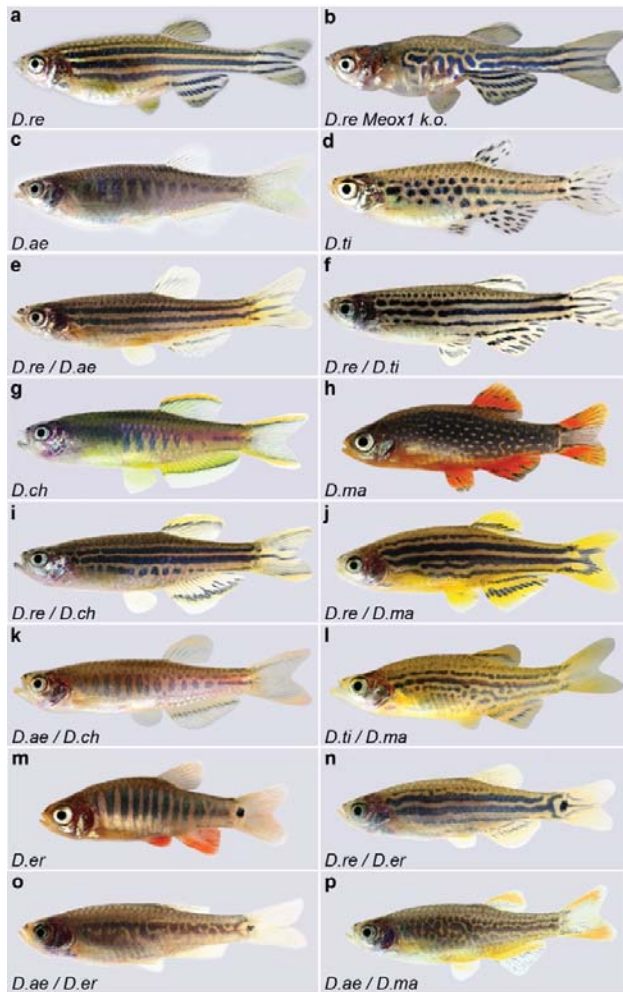

639

640 **Fig. 1: Colour patterns in *Danio* fish and interspecific hybrids.**

641 **a**, Colour pattern of zebrafish, *D. rerio* (*D.re*). **b**, *D. rerio* *Meox1* (*choker*) mutants,  
642 which lack a horizontal myoseptum. **c**, *D. aesculapii* (*D.ae*). **d**, *D. tinwini* (*D.ti*). **e**,  
643 Interspecific hybrid between *D. rerio* and *D. aesculapii* and, **f**, between *D. rerio* and  
644 *D. tinwini*. **g**, *D. choprae* (*D.ch*). **h**, *D. margaritatus* (*D.ma*). **i** Interspecific hybrid  
645 between *D. rerio* and *D. choprae*, **j**, and between *D. rerio* and *D. margaritatus*. **k**,  
646 Interspecific hybrid between *D. aesculapii* and *D. choprae*. **l**, Interspecific hybrid  
647 between *D. tinwini* and *D. margaritatus*. **m**, *D. erythromicron* (*D. er*). **n**, Interspecific  
648 hybrid between *D. rerio* and *D. erythromicron*. **o**, Interspecific hybrid between  
649 *D. aesculapii* and *D. erythromicron*. **p**, Interspecific hybrid between *D. aesculapii* and  
650 *D. margaritatus*.



651

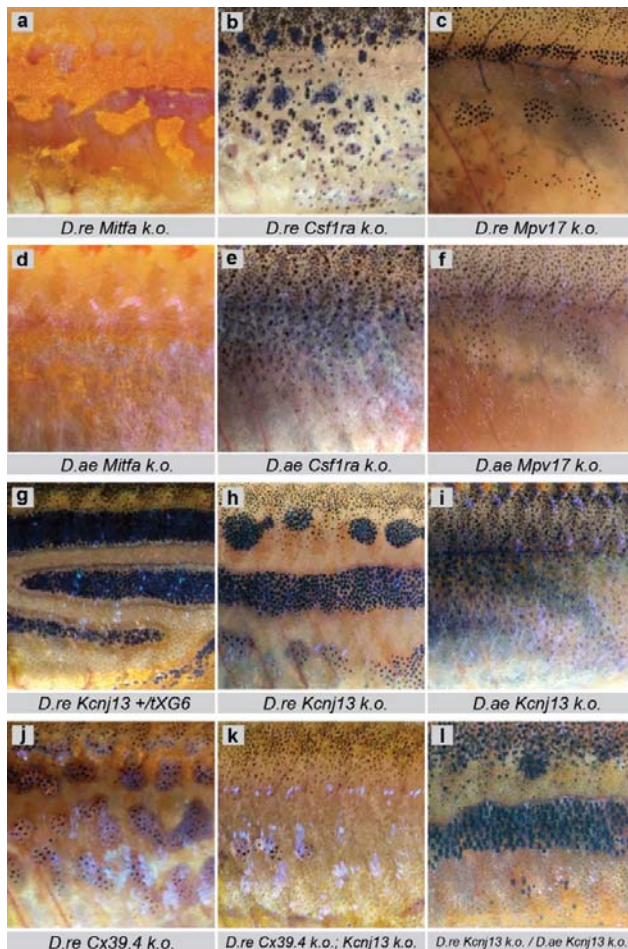

652

653 **Fig. 2: Mutant phenotypes in *D. rerio*, *D. aesculapii* and their hybrids.**

654 In *D. rerio* loss of one type of pigment cell, **a**, melanophores in *Mitfa* (*nacre*) mutants,  
655 **b**, xanthophores in *Csf1ra* (*pfeffer*) mutants, or **c**, iridophores in *Mpv17* (*transparent*)  
656 mutants, still permits rudimentary aggregation of dense iridophores (a) or  
657 melanophores (b, c). In *D. aesculapii*, **d**, loss of melanophores in *Mitfa* mutants or **e**,  
658 loss of xanthophores in *Csf1ra* mutants, abrogate any residual pattern formation.  
659 However, **f**, bars still form in *Mpv17* mutants, despite the absence of iridophores. **g**,  
660 *D. rerio* heterozygous for the dominant allele *Kcnj13*<sup>tXG6</sup>/*obelix*. **h**, *D. rerio*  
661 homozygous for the loss-of-function allele *Kcnj13*<sup>24ui</sup>. **i**, *D. aesculapii* homozygous  
662 for a *Kcnj13* loss-of-function allele. **j**, *D. rerio* homozygous for the loss-of-function of  
663 *Cx39.4*. **k**, in *D. rerio* double mutants for *Cx39.4* and *Kcnj13* patterning is completely  
664 absent. **l**, interspecific hybrids between *D. rerio* and *D. aesculapii* that are both  
665 mutant in *Kcnj13*.

666

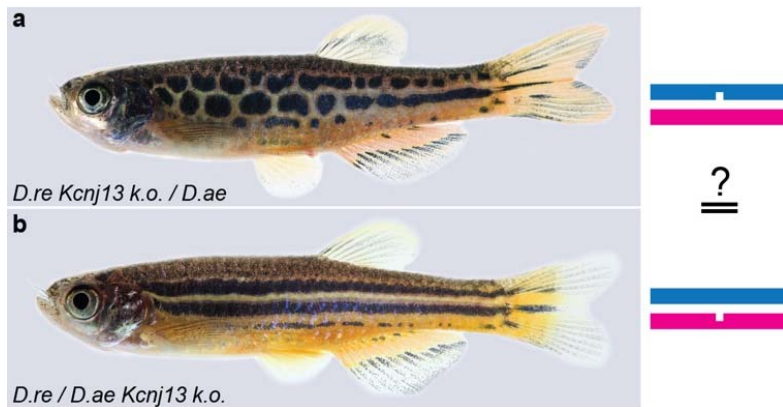

667

668 **Fig. 3: A reciprocal heterozygosity test to identify *Kcnj13* evolution.**

669 Two interspecific hybrids between *D. rerio* and *D. aesculapii*, which are  
670 heterozygous for a *Kcnj13* loss-of-function mutation. **a**, stripes are interrupted in  
671 hybrids carrying the mutant allele from *D. rerio* (nick in the blue line representing the  
672 zebrafish genome). **b**, hybrids carrying the mutant allele from *D. aesculapii* (nick in  
673 the magenta line, representing the *D. aesculapii* genome) are indistinguishable from  
674 wild-type hybrids (Fig. 1e).

675

676

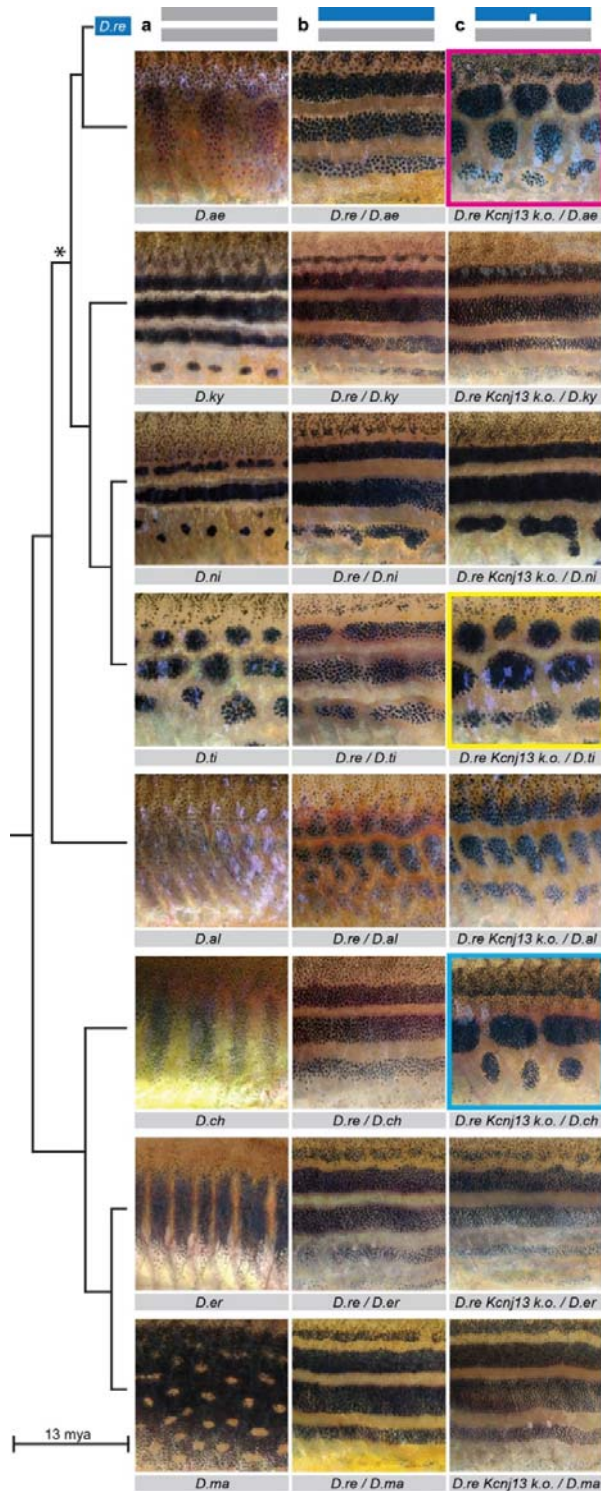

677

678 **Fig. 4: Repeated *Kcnj13* evolution.**

679 **a**, From top to bottom wild-type *Danio* colour patterns (*D. rerio* species group: barred

680 *D. aesculapii*, *D.ae*, the closest relative to *D. rerio*; striped *D. kyathit*, *D.ky*; striped

681 *D. nigrofasciatus*, *D.ni*; spotted *D. tinwini*, *D.ti*;) unpatterned *D. albolineatus*, *D.al*; (*D.*  
682 *choprae* species group: barred *D. choprae*, *D.ch*; barred *D. erythromicron*, *D.er*,  
683 spotted *D. margaritatus*, *D.ma*). The phylogenetic tree to the left depicts the  
684 relationships between the species<sup>1</sup>. The asterisk denotes an uncertainty in the  
685 phylogenetic relationships within the *D. rerio* species group. **b**, Hybrids between  
686 *D. rerio* (*D.re*) and eight other danios (from top to bottom *D. aesculapii*, *D.ae*,  
687 *D. kyathit*, *D.ky*, *D. nigrofasciatus*, *D.ni*, *D. tinwini*, *D.ti*, *D. albolineatus*, *D.al*,  
688 *D. choprae*, *D.ch*, *D. erythromicron*, *D.er*, *D. margaritatus*, *D.ma*). **c**, Interspecific  
689 hybrids carrying the *Kcnj13* k.o. allele from *D. rerio* and the wild-type allele in the  
690 eight species. Pattern defects occur in three cases, *D. rerio Kcnj13* k.o. / *D.*  
691 *aesculapii* (magenta box), *D. rerio Kcnj13* k.o. / *D. tinwini* (yellow box) and *D. rerio*  
692 *Kcnj13* k.o. / *D. choprae* (cyan box). In the other five cases the patterns in  
693 heterozygous hybrids do not differ from the striped patterns of wild-type hybrids.

694 **Extended Data Figures, Tables and Legends**

695

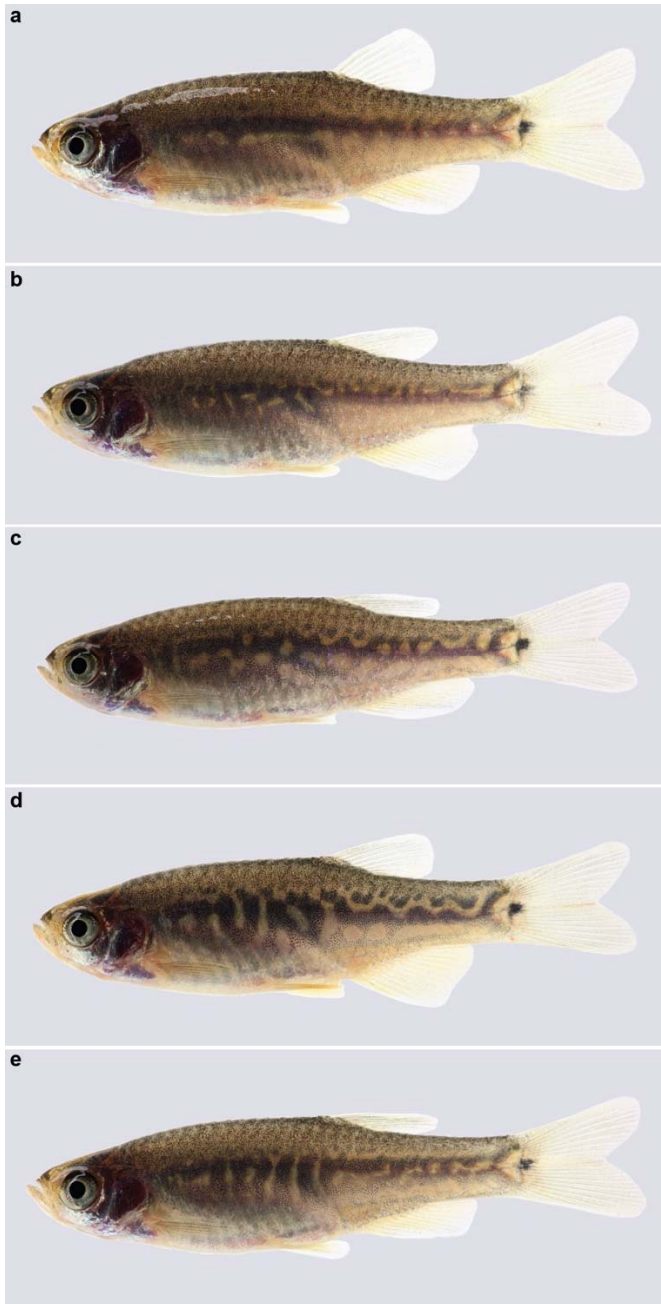

696

697 **Extended Data Fig. 1: Variability of patterns in interspecific hybrids between *D.***  
698 ***aesculapii* and *D. erythromicron***

699 Interspecific hybrids between *D. aesculapii* and *D. erythromicron*, **a - e**, show a  
700 range of patterns without clear horizontal or vertical orientation.

701



702

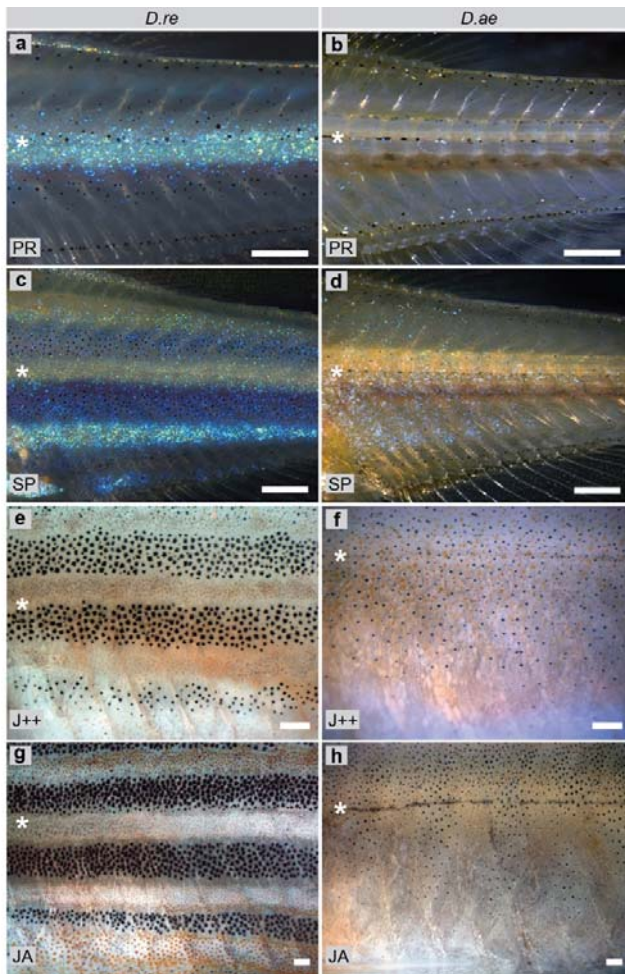

703

704 **Extended Data Fig. 2: Development of colour patterns in *D. rerio* and *D.***  
705 ***aesculapii*.**

706 **a**, *D. rerio* fish at stage PR. Iridophores (arrowhead) emerge along the horizontal  
707 myoseptum (asterisk) to form the first light stripe. **b**, *D. aesculapii* fish at stage PR. **c**,  
708 *D. rerio* at stage SP. The first light stripe is flanked dorsally and ventrally by dark  
709 stripes **d**, *D. aesculapii* at stage SP. Iridophores emerge in a scattered fashion. **e**, *D.*  
710 *rerio* at stage J++. Light stripes are covered by compact xanthophores **f**, *D.*  
711 *aesculapii* at stage J++. Melanophores and xanthophores broadly intermix. **g**, *D.*  
712 *rerio* at stage JA. **h**, *D. aesculapii* at stage JA. Melanophores and xanthophores sort  
713 out loosely into vertical bars of low contrast; no dense iridophores are visible  
714 between the dark bars. a-d: incident light illumination to highlight iridophores, e-h:  
715 bright field illumination to visualise xanthophores and melanophores. Staging  
716 according to<sup>2</sup>. PB (pectoral fin bud, 7.2 mm SL). SP (squamation posterior, 9.5 mm

717 SL). J++ (juvenile posterior, 16 mm SL). JA (juvenile-adult, >16 mm SL). Scale bars  
718 correspond to 250  $\mu\text{m}$ .  
719



720

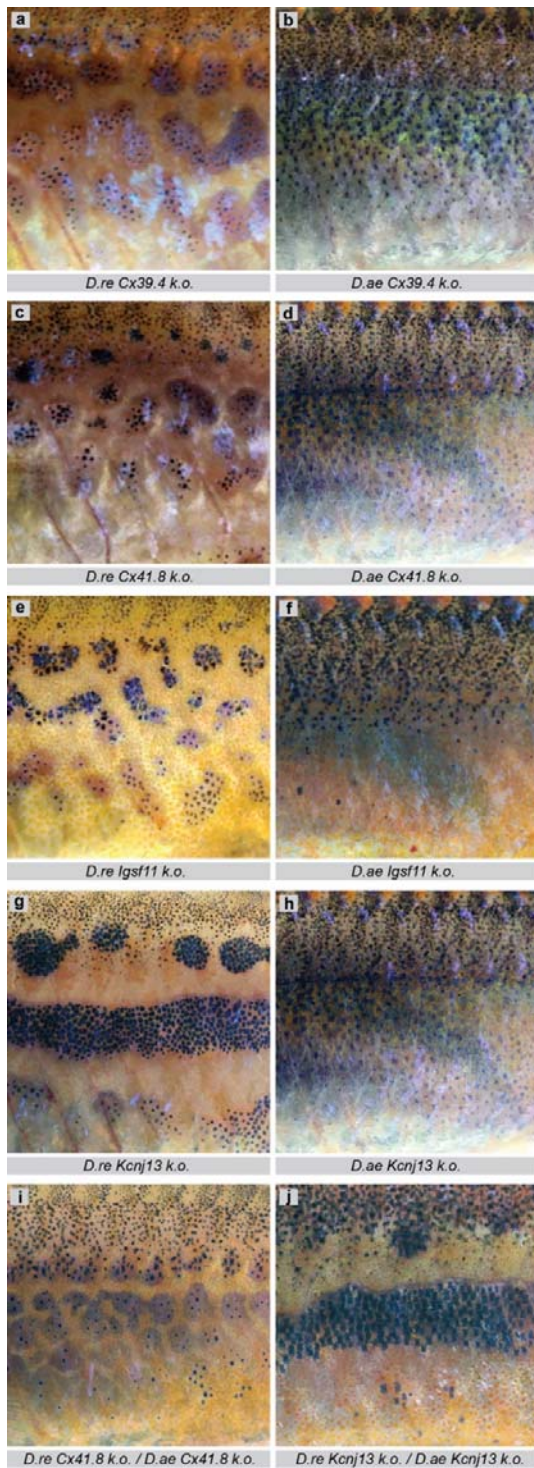

721

722 **Extended Data Fig. 3: Mutant phenotypes in *D. rerio* and *D. aesculapii* of genes**  
723 **required for heterotypic interactions.**

724 **a, *D. rerio* (*D.re*) *Cx39.4* knock-out (k.o.) mutant<sup>3</sup>. b, *D. aesculapii* (*D.ae*) *Cx39.4* k.o.**  
725 **mutant. c, *D.re Cx41.8* mutant<sup>4,5</sup>. d, *D.ae Cx41.8* k.o. mutant. e, *D.re Igsf11* k.o.**

726 mutant<sup>6</sup>. **f**, *D. ae Igsf11* mutant. **g**, *D. rerio Kcnj13* k.o. mutant<sup>3,4,7</sup>. **h**, *D. ae Kcnj13*  
727 k.o. mutant. **i**, Interspecific hybrids between *D. re Cx41.8* and *D. ae Cx41.8* mutants. **j**,  
728 Interspecific hybrids between *D. re Kcnj13* and *D. ae Kcnj13* mutants. In all cases,  
729 loss-of function (k.o.) alleles were created using CRISPR/Cas9 gene editing.  
730

731

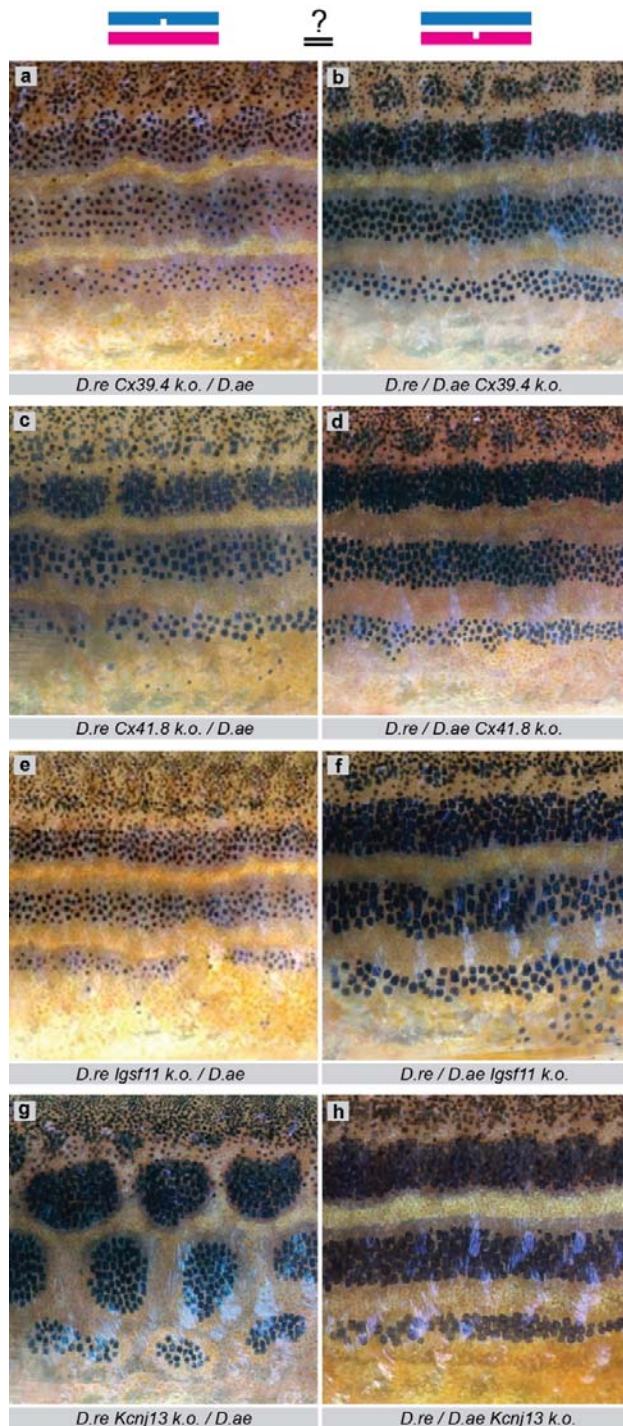

732

733 **Extended Data Fig. 4: Reciprocal heterozygosity tests identify *Kcnj13***  
734 **evolution.**

735 Interspecific heterozygous hybrids carrying a mutant allele (nicked bar) from either  
736 parental species (blue: *D. rerio*, *D.re*, or magenta: *D. aesculapii*, *D.ae*) in an  
737 otherwise identical genetic background. In the cases of **a/b**, *Cx39.4*, **c/d**, *Cx41.8* and

738 **e/f**, *Igsf11* both hybrids show identical phenotypes. In the case of **g/h**, *Kcnj13*, the  
739 two hybrids show different phenotypes: Interrupted stripes and spots in those  
740 carrying the mutant allele from *D. rerio* (g) and a striped pattern in those carrying the  
741 mutant allele from *D. aesculapii* (h).

742

743

744





751 (blue) and human<sup>9-13</sup> (purple). Positions that are different between *D. rerio* and  
752 *D. aesculapii* (magenta), *D. tinwini* (yellow), *D. choprae* (cyan) and polymorphic  
753 positions in *D. rerio* (dark grey) are highlighted. Kcnj13 sequences of *Danio rerio*  
754 (zebrafish, NP\_001039014.1), *Lepisosteus oculatus* (spotted gar, XP\_006638004.1),  
755 *Xenopus tropicalis* (tropical clawed frog, NP\_001096437.1), *Anolis carolinensis*  
756 (green anole, XP\_016847621.1), *Geospiza fortis* (medium ground finch,  
757 XP\_005430275.1), *Gallus gallus* (chicken, XP\_015132697.1), *Mus musculus* (house  
758 mouse, NP\_001103697.1) and *Homo sapiens* (human, NP\_002233.2).

759



760

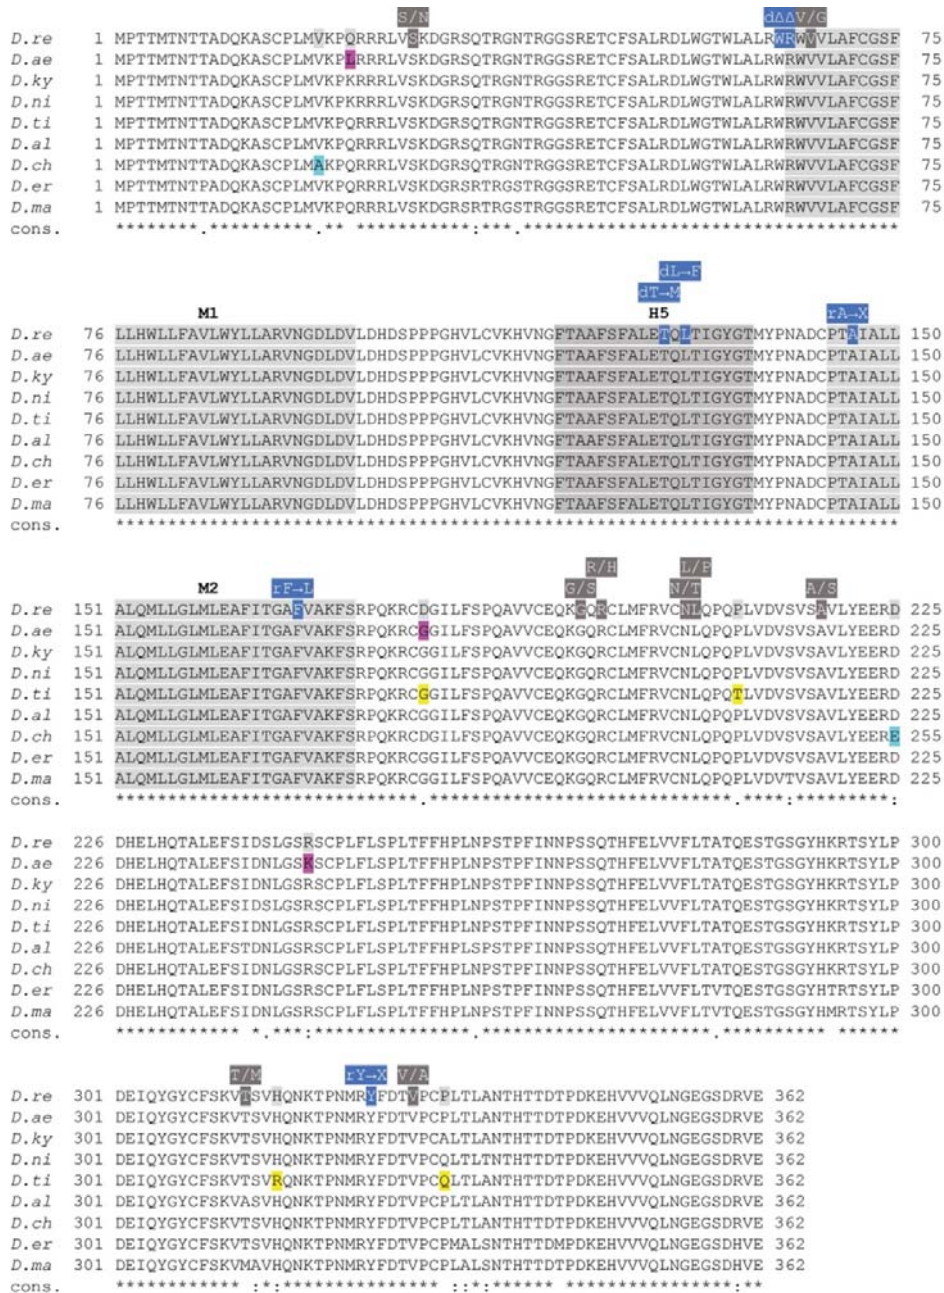

761

762 **Extended Data Fig. 6: Sequence alignment of Kcnj13 orthologues from *Danio***  
 763 **species.**

764 Kcnj13 sequences from *D. rerio* (*D.re*), *D. aesculapii* (*D.ae*), *D. kyathit* (*D.ky*),  
 765 *D. nigrofasciatus* (*D.ni*), *D. tinwini* (*D.ti*), *D. albolineatus* (*D.al*), *D. choprae* (*D.ch*),  
 766 *D. margaritatus* (*D.ma*), *D. erythromicron* (*D.er*). Amino acids evolved between *D.re*  
 767 and *D.ae* (magenta), *D.ti* (yellow) and *D.ch* (cyan). Dominant (d) or recessive (r)

768 mutations in *D.re Kcnj13*<sup>3,4,7,8</sup> (blue). Amino acid polymorphisms in *D.re* (dark grey).  
769 Transmembrane domains (M1/M2) (light grey blocks) and the P-loop (H5) (dark grey  
770 block).

771

## 772 **Figure References**

- 773 1 McCluskey, B. M. & Postlethwait, J. H. Phylogeny of zebrafish, a "model  
774 species," within Danio, a "model genus". *Mol Biol Evol* **32**, 635-652,  
775 doi:10.1093/molbev/msu325 (2015).
- 776 2 Parichy, D. M., Elizondo, M. R., Mills, M. G., Gordon, T. N. & Engeszer, R. E.  
777 Normal table of postembryonic zebrafish development: staging by externally  
778 visible anatomy of the living fish. *Developmental dynamics : an official  
779 publication of the American Association of Anatomists* **238**, 2975-3015,  
780 doi:10.1002/dvdy.22113 (2009).
- 781 3 Irion, U. *et al.* Gap junctions composed of connexins 41.8 and 39.4 are  
782 essential for colour pattern formation in zebrafish. *Elife* **3**, e05125,  
783 doi:10.7554/eLife.05125 (2014).
- 784 4 Haffter, P. *et al.* Mutations affecting pigmentation and shape of the adult  
785 zebrafish. *Development genes and evolution* **206**, 260-276, doi:DOI  
786 10.1007/s004270050051 (1996).
- 787 5 Watanabe, M. *et al.* Spot pattern of leopard Danio is caused by mutation in  
788 the zebrafish connexin41.8 gene. *EMBO reports* **7**, 893-897,  
789 doi:10.1038/sj.embor.7400757 (2006).
- 790 6 Eom, D. S. *et al.* Melanophore migration and survival during zebrafish adult  
791 pigment stripe development require the immunoglobulin superfamily adhesion  
792 molecule Igsf11. *PLoS genetics* **8**, e1002899,  
793 doi:10.1371/journal.pgen.1002899 (2012).
- 794 7 Iwashita, M. *et al.* Pigment pattern in jaguar/obelix zebrafish is caused by a  
795 Kir7.1 mutation: implications for the regulation of melanosome movement.  
796 *PLoS genetics* **2**, e197, doi:10.1371/journal.pgen.0020197 (2006).
- 797 8 Henke, K. *et al.* Genetic Screen for Postembryonic Development in the  
798 Zebrafish (*Danio rerio*): Dominant Mutations Affecting Adult Form. *Genetics*  
799 **207**, 609-623, doi:10.1534/genetics.117.300187 (2017).

- 800 9 Hejtmancik, J. F. *et al.* Mutations in KCNJ13 cause autosomal-dominant  
801 snowflake vitreoretinal degeneration. *Am J Hum Genet* **82**, 174-180,  
802 doi:10.1016/j.ajhg.2007.08.002 (2008).
- 803 10 Sergouniotis, P. I. *et al.* Recessive mutations in KCNJ13, encoding an  
804 inwardly rectifying potassium channel subunit, cause leber congenital  
805 amaurosis. *Am J Hum Genet* **89**, 183-190, doi:10.1016/j.ajhg.2011.06.002  
806 (2011).
- 807 11 Khan, A. O., Bergmann, C., Neuhaus, C. & Bolz, H. J. A distinct vitreo-retinal  
808 dystrophy with early-onset cataract from recessive KCNJ13 mutations.  
809 *Ophthalmic Genet* **36**, 79-84, doi:10.3109/13816810.2014.985846 (2015).
- 810 12 Perez-Roustit, S. *et al.* Leber Congenital Amaurosis with Large Retinal  
811 Pigment Clumps Caused by Compound Heterozygous Mutations in Kcnj13.  
812 *Retin Cases Brief Rep* **11**, 221-226, doi:10.1097/ICB.0000000000000326  
813 (2017).
- 814 13 Toms, M. *et al.* Missense variants in the conserved transmembrane M2  
815 protein domain of KCNJ13 associated with retinovascular changes in humans  
816 and zebrafish. *Exp Eye Res* **189**, 107852, doi:10.1016/j.exer.2019.107852  
817 (2019).
- 818

819 **Supplementary Information and Legends**

820

821 **Supplementary Tables**

822 **Table 1 | List of targeted genes.**

| target                      | CRISPR target sequence (5'-3') | genotyping    |
|-----------------------------|--------------------------------|---------------|
| <i>D. aesculapii csf1ra</i> | GGCCTTTAACCTGGTCCGGTC          | T2143, T2144  |
| <i>D. aesculapii cx39.4</i> | GGACTCACAGCCGGGCTGTT           | T2145, T2146  |
| <i>D. aesculapii cx41.8</i> | GAACCTTTCTAGAAGAAGTCC          | MP92, MP318   |
| <i>D. aesculapii igsf11</i> | GCTGAAAGTACAGGGCAAGA           | MP330, MP 331 |
| <i>D. aesculapii kcnj13</i> | TGCTGTATTATGGTACCTGC           | T963, T964    |
| <i>D. aesculapii mitfa</i>  | GGAGCGCTGGCTCCGGGTCC           | T2147, T2148  |
| <i>D. aesculapii mpv17</i>  | GGTGCTTTTCTGGGAATAAC           | T2149, T2150  |
| <i>D. rerio igsf11</i>      | GGACGCAATATAGGAGTGAT           | T1449, T1450  |
| <i>D. rerio kcnj13</i> (1)  | GGCAAGCAGCGCGATGGCAG           | T2139, T2140  |
| <i>D. rerio kcnj13</i> (2)  | GGCTGGCGCTACGGTGGCGG           | T963, T964    |

823

824 **Table 2 | Primer pairs used for the generation of sgRNAs.**

| target                      | forward                | reverse                 |
|-----------------------------|------------------------|-------------------------|
| <i>D. aesculapii csf1ra</i> | AAACGACCGACCAGGTTAAAGG | TAGGCCTTTAACCTGGTCCGGTC |
| <i>D. aesculapii cx39.4</i> | AAACAACAGCCCGGCTGTGAGT | TAGGACTCACAGCCGGGCTGTT  |
| <i>D. aesculapii mitfa</i>  | AAACGGACCCGGAGCCAGCGCT | TAGGAGCGCTGGCTCCGGGTCC  |
| <i>D. aesculapii mpv17</i>  | AAACGTTATTCCCAGAAAAGCA | TAGGTGCTTTTCTGGGAATAAC  |
| <i>D. rerio csf1ra</i>      | AAACGACCGACCAGGTTAAAGG | TAGGCCTTTAACCTGGTCCGGTC |
| <i>D. rerio igsf11</i>      | AAACATCACTCCTATATTGCGT | TAGGACGCAATATAGGAGTGAT  |
| <i>D. rerio kcnj13</i> (1)  | AAACCCGCCACCGTAGCGCCAG | TAGGCTGGCGCTACGGTGGCGG  |
| <i>D. rerio kcnj13</i> (2)  | AAACCTGCCATCGCGCTGCTTG | TAGGCAAGCAGCGCGATGGCAG  |

825

826 **Table 3 | Primers used for genotyping.**

| primer name | sequence (5'-3')        |
|-------------|-------------------------|
| MP318       | AGCTGTGCCAAGAACCAAGA    |
| MP330       | CCCCCATGCATTTTATTTGACCA |
| MP331       | CTGAATTCAGAAAGGAGGAGGT  |
| MP92        | CTCCCTTCCATTCACACTACC   |
| T963        | GAAACTATTCTTGCCGTGACTTG |
| T964        | TCAAACAAACCTGGGTGTGGAC  |

|       |                       |
|-------|-----------------------|
| T1449 | TCATCTACCAGAGTGGTCAG  |
| T1450 | CCTAAACTTTTGCAGCACAG  |
| T2139 | TCAATGGAGACCTGGATGTC  |
| T2140 | TGGACCAAAGTGTGAAAGC   |
| T2143 | TGCCTGTGTTTATGTGTCTG  |
| T2144 | AATGACCAAGAAGGATGAGC  |
| T2145 | GCCTCTAGGAACATGATTGG  |
| T2146 | GCTTCTCATTCTAGCCCTC   |
| T2147 | GGCAACATTGGCGTTATCTC  |
| T2148 | TCTCACAGCATTCTGGCAC   |
| T2149 | CTGCCGTTTATATCTCCACAG |
| T2150 | GGCTGAAAATTGGCTGATTG  |

827

828 Table 4 | List of generated mutants.

| mutant                                              | mutation       | description according to <sup>1</sup>                                  |
|-----------------------------------------------------|----------------|------------------------------------------------------------------------|
| <i>D. aesculapii</i> <i>Csf1ra</i> <sup>t31ui</sup> | 4 bp deletion  | recessive,<br>c.1500_1503delGGTC<br>p.Gly502LysfsX35                   |
| <i>D. aesculapii</i> <i>Cx39.4</i> <sup>t15ui</sup> | 8 bp deletion  | recessive,<br>c.175_182delAAACAGCC<br>p.Lys59_ArgfsX2                  |
| <i>D. aesculapii</i> <i>Cx39.4</i> <sup>t59ui</sup> | 21 bp deletion | recessive,<br>c.168_188delCAACACCAAACAGCCCCGGCTG<br>p.Asn57_Cys63del   |
| <i>D. aesculapii</i> <i>Cx41.8</i> <sup>t18mp</sup> | 18 bp deletion | recessive,<br>c.41_58delTCCAGGAGCATTCAACCT<br>p.Val14AlaGlu15_Ser20del |
| <i>D. aesculapii</i> <i>Igsf11</i> <sup>t10mp</sup> | 1 bp insertion | recessive,<br>c.130dupT<br>p.Leu44PhefsX12                             |
| <i>D. aesculapii</i> <i>Igsf11</i> <sup>t19mp</sup> | 11 bp deletion | recessive,<br>c.129_139delCTTGCCCTGTA<br>p.Leu44PhefsX8                |
| <i>D. aesculapii</i> <i>Kcnj13</i> <sup>t11mp</sup> | 4 bp deletion  | recessive,<br>c.260_263delACCT<br>p.Tyr87CysfsX27                      |
| <i>D. aesculapii</i> <i>Mitfa</i> <sup>t30ui</sup>  | 7 bp deletion  | recessive,<br>c.194_200delGACCCGG                                      |

|                                                   |                 |                                                                 |
|---------------------------------------------------|-----------------|-----------------------------------------------------------------|
|                                                   |                 | p.Gly65GlufsX22                                                 |
| <i>D. aesculapii</i> <i>Mpv17</i> <sup>32ui</sup> | 4 bp deletion   | recessive,<br>c.321_324delAATA<br>p.Ile108LeufsX6               |
| <i>D. rerio</i> <i>Igsf11</i> <sup>135ui</sup>    | 17 bp deletion  | recessive,<br>c.412_428delGTGATCGGCCTGACGGT<br>p.Ile138AlafsX19 |
| <i>D. rerio</i> <i>Kcnj13</i> <sup>dt58ui</sup>   | 6 bp deletion   | dominant,<br>c.190_195delITGGCGG<br>p.Trp64Arg65del             |
| <i>D. rerio</i> <i>Kcnj13</i> <sup>124ui</sup>    | 14 bp insertion | recessive,<br>c.436_437insGATGGAAGATGCTT<br>p.Ala146GlyfsX28    |

829

### 830 Supplementary Discussion

831 *Kcnj13* functions as a tetramer (Fig. 4d, e), where each subunit contributes two  
832 transmembrane helices (M1 and M2, Extended Data Fig. 4) to the formation of the  
833 channel pore and a short extracellular loop that folds back to form the pore lining ion  
834 selectivity filter (P-loop or H5, Extended Data Fig. 4). The N- and C-termini of the  
835 subunits reside in the cytoplasm, where they also contribute to the ion pore, but are  
836 mainly involved in gating of the channel (reviewed in<sup>2</sup>). Four dominant *Kcnj13* alleles  
837 have been identified in *D. rerio* in several independent forward genetic screens  
838 (Extended Data Fig. 4)<sup>3-5</sup>. All of them show broad stripes with irregular interruptions  
839 when heterozygous (Fig. 2g) and strong pattern aberrations with fewer, wider and  
840 interrupted dark stripes and some mixing of melanophores and xanthophores when  
841 homozygous or trans-heterozygous. Three of them carry point mutations affecting  
842 H5 or M2<sup>3,4,6</sup>, one is the result of a C-terminal truncation (Extended Data Fig. 4)<sup>5</sup>.  
843 The point mutations lead to proteins that do not produce functional channels<sup>6</sup> and it  
844 has been suggested that the dominant phenotype is caused by a dosage-dependent  
845 effect, i.e. haploinsufficiency<sup>7</sup>. To test this possibility we used the CRISPR/Cas9  
846 system and generated a loss of function allele of *Kcnj13* in *D. rerio* which is  
847 recessive. The 14 base pair insertion near the end of the first coding exon leads to  
848 an early truncation of the protein. Homozygous mutants show a phenotype similar to  
849 homozygous mutants for the dominant alleles (Fig. 2h)<sup>3-7</sup>. This shows that the  
850 dominant alleles are dominant-negatives, where the mutant proteins inhibit the



851 function of the wild-type protein in heterozygotes. The generation of this recessive  
852 allele allowed us to perform the reciprocal heterozygosity test with *D. aesculapii* as  
853 well as interspecific complementation with seven other *Danio* species<sup>8</sup>.

854

## 855 **Supplementary Information References**

- 856 1 Ogino, S. *et al.* Standard mutation nomenclature in molecular diagnostics:  
857 practical and educational challenges. *J Mol Diagn* **9**, 1-6,  
858 doi:10.2353/jmoldx.2007.060081 (2007).
- 859 2 Hibino, H. *et al.* Inwardly rectifying potassium channels: their structure,  
860 function, and physiological roles. *Physiol Rev* **90**, 291-366,  
861 doi:10.1152/physrev.00021.2009 (2010).
- 862 3 Haffter, P. *et al.* Mutations affecting pigmentation and shape of the adult  
863 zebrafish. *Development genes and evolution* **206**, 260-276, doi:DOI  
864 10.1007/s004270050051 (1996).
- 865 4 Irion, U. *et al.* Gap junctions composed of connexins 41.8 and 39.4 are  
866 essential for colour pattern formation in zebrafish. *Elife* **3**, e05125,  
867 doi:10.7554/eLife.05125 (2014).
- 868 5 Henke, K. *et al.* Genetic Screen for Postembryonic Development in the  
869 Zebrafish (*Danio rerio*): Dominant Mutations Affecting Adult Form. *Genetics*  
870 **207**, 609-623, doi:10.1534/genetics.117.300187 (2017).
- 871 6 Iwashita, M. *et al.* Pigment pattern in jaguar/obelix zebrafish is caused by a  
872 Kir7.1 mutation: implications for the regulation of melanosome movement.  
873 *PLoS genetics* **2**, e197, doi:10.1371/journal.pgen.0020197 (2006).
- 874 7 Maderspacher, F. & Nüsslein-Volhard, C. Formation of the adult pigment  
875 pattern in zebrafish requires leopard and obelix dependent cell interactions.  
876 *Development* **130**, 3447-3457 (2003).
- 877 8 Parichy, D. M. & Johnson, S. L. Zebrafish hybrids suggest genetic  
878 mechanisms for pigment pattern diversification in *Danio*. *Development genes*  
879 *and evolution* **211**, 319-328 (2001).

880
